# Supplementary material
Source: MDPI journal article supplement (https://www.mdpi.com/2673-7078/2/3/32)
Supplement: s1 [file s1]

Archive with 1 entries (1 files):
- biomechanics-1829416-supplementary.pdf
